# Supplementary material for: Simple and rapid analysis of muscarine in human urine using dispersive micro-solid phase extraction and ultra-high performance liquid chromatography-high resolution mass spectrometry
Source: Royal Society of Chemistry journal article supplement (doi:10.1039/c5ay00209e), 2015-01-01
Supplement: c5ay00209e1.pdf [file c5ay00209e1.pdf]

## Supplementary Data

Simple and rapid analysis of muscarine in human urine using dispersive micro solid phase extraction and ultra high performance liquid chromatography-high resolution mass spectrometry

Dawei Chen, Shuo Zhang, Hong Miao, Yunfeng Zhao<sup>\*</sup>, Yongning Wu<sup>\*</sup>

*Key Laboratory of Food Safety Risk Assessment, Ministry of Health; China National Center for Food Safety Risk Assessment, Beijing 100021, China*

<sup>\*</sup>Correspondence: Yunfeng Zhao

E-mail: [zhaoyf703@126.com](mailto:zhaoyf703@126.com)

Tel: +86-10-67790051

Fax: +86-10-67790051

<sup>\*</sup>Correspondence: Yongning Wu

E-mail: [wuyongning@cfsa.net.cn](mailto:wuyongning@cfsa.net.cn)

Tel: +86-10-52165589

Fax: +86-10-52165489

### **Chromatographic conditions for analysis of muscarine in three different columns.**

The aqueous phase (A) consisted of a mixture of 0.1% of formic acid and 4 mM ammonium formate in water, and the organic phase (B) was acetonitrile with 0.1% formic acid.

HILIC column: The gradient started at 98% B was reduced to 80% B in the next 2 minutes and then linearly ramped to 40% B in the following 5 minutes. This was followed by re-equilibration at 98% B for 3 minutes prior to the next injection. The flow rate was set to 300  $\mu$ L/min. (Retention time: 4.56 min for muscarine)

C<sub>18</sub> column: The gradient started at 5% B for 2 minutes, was raised to 30% B in the next 3 minutes and then linearly ramped to 100% B in the following 1 minutes. This was followed by re-equilibration at 5% B for 3 minutes prior to the next injection. The flow rate was set to 200  $\mu$ L/min. (Retention time: 1.21 min for muscarine)

T<sub>3</sub> column: The gradient started at 2% B for 2 minutes, was raised to 50% B in the next 3 minutes and then linearly ramped to 100% B in the following 1 minutes. This was followed by re-equilibration at 2% B for 3 minutes prior to the next injection. The flow rate was set to 200  $\mu$ L/min. (Retention time: 2.11 min for muscarine)

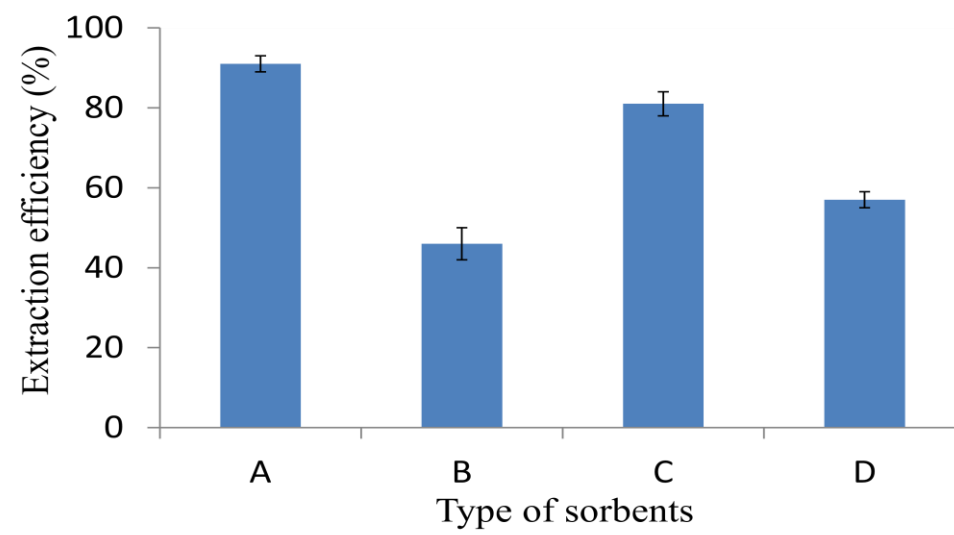

Figure S1 The effect of the different sorbents on the extraction efficiency ( $n = 3$ ). (A) Cleanert® COOH, (B) Cleanert® SCX, (C) Cleanert® PWCX, (D) Cleanert® PCX.

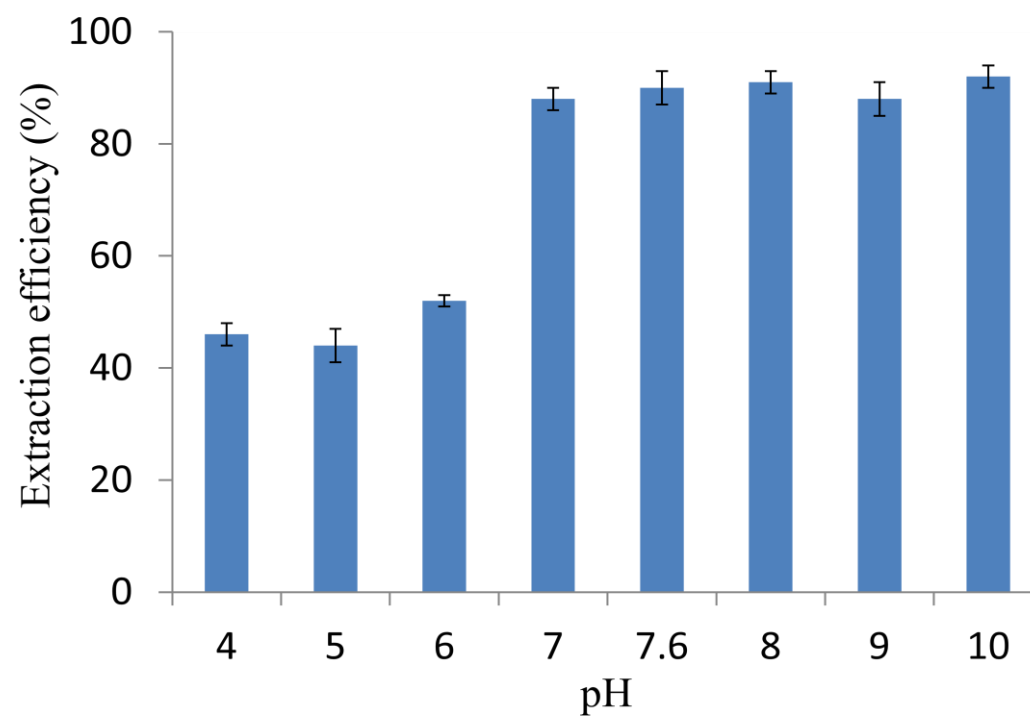

Figure S2 Effect of pH on the extraction efficiency ( $n = 3$ ).

RT: 3.55 - 5.50 SM: 7G

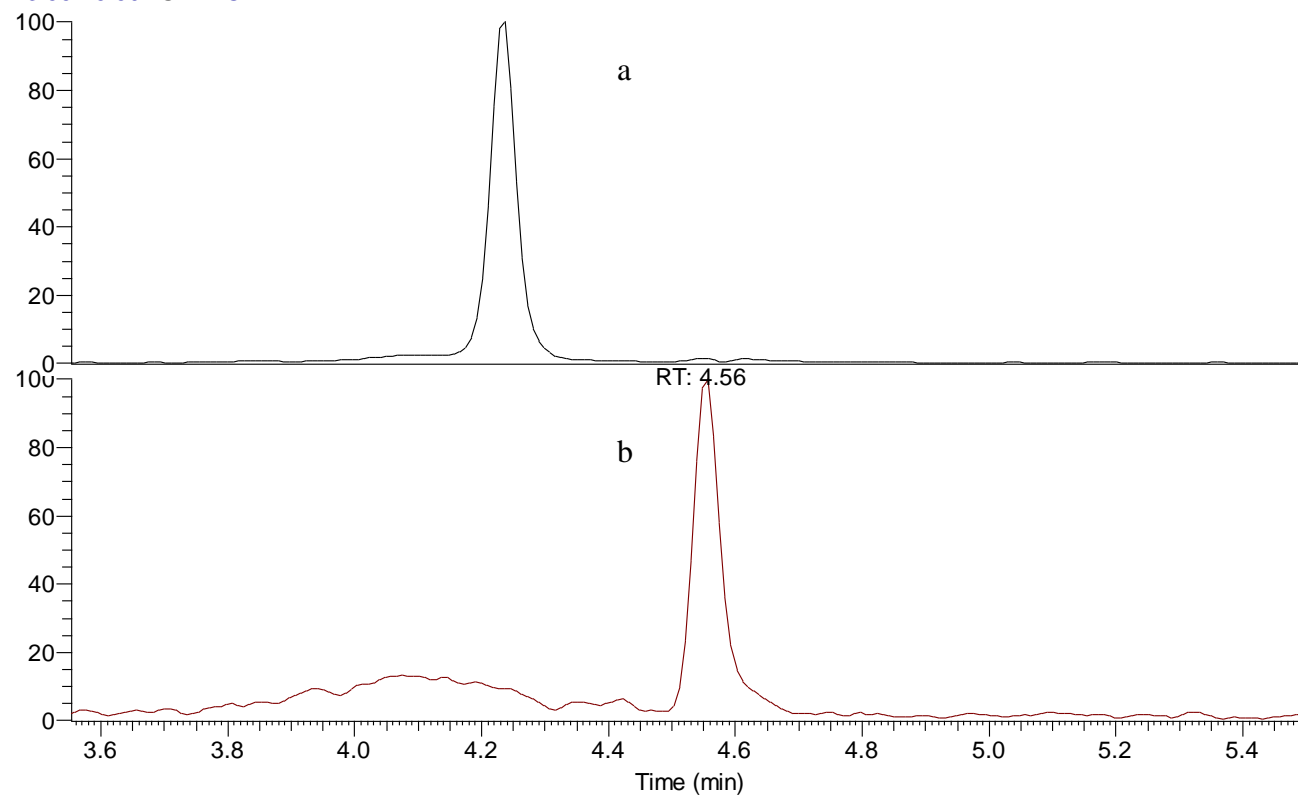

NL: 7.12E5  
m/z=  
174.14796-174.14970 F:  
FTMS + p ESI Full ms2  
174.15@hcd30.00  
[50.00-375.00] MS  
kb\_140730164717

NL: 8.64E4  
m/z=  
174.14796-174.14970 F:  
FTMS + p ESI Full ms2  
174.15@hcd30.00  
[50.00-375.00] MS  
std-20ppt

Figure S3 Chromatograms of blank urine (a) and muscarine standard (RT: 4.56 min) at the concentration of 0.02 µg/L (b).
